# Supplementary material
Source: publisher site journal article supplement (https://www.dovepress.com/article/335102)
Supplement: Supplementary file 1 [file get_supplementary_file.php]

**Supplementary table 1** Risk of bias for non-randomized controlled trials included in the meta-analysis

| Items/author*                                                                 | Tulchinsky<br>2010 | Koo<br>2012 | Polese<br>2012 | Kwag<br>2014 | Adloff<br>1980 | Cheregi<br>2017 | Lu<br>2016 |
|-------------------------------------------------------------------------------|--------------------|-------------|----------------|--------------|----------------|-----------------|------------|
| Inclusion criteria                                                            | 1                  | 1           | 1              | 1            | 1              | 1               | 1          |
| Exclusion criteria                                                            | 1                  | 1           | 1              | 1            | 1              | 1               | 1          |
| Comparable demographics?                                                      | 1                  | 0           | 0              | 1            | 0              | 0               | 1          |
| Could the number of participating centers be determined?                      | 1                  | 1           | 1              | 1            | 1              | 1               | 1          |
| Could the number of surgeons who participated be determined?                  | 0                  | 0           | 0              | 1            | 0              | 0               | 0          |
| Could the reader determine where the authors were on the learning             | 0                  | 0           | 0              | 1            | 0              | 0               | 0          |
| Curve for the reported procedure?                                             |                    |             |                |              | 0              | 0               | 0          |
| Were diagnostic criteria clearly stated for clinical outcomes if required?    | 1                  | 1           | 1              | 1            | 0              | 0               | 1          |
| Was the surgical technique adequately described?                              | 1                  | 1           | 1              | 1            | 1              | 1               | 1          |
| Did they try to standardize the surgical technique?                           | 0                  | 0           | 1              | 0            | 1              | 1               | 1          |
| Did they try to standardize perioperative care?                               | 0                  | 0           | 1              | 1            | 0              | 0               | 0          |
| Was the age and range given for patients in the Study group?                  | 1                  | 0           | 1              | 0            | 1              | 1               | 1          |
| Did the authors address whether there were any missing data?                  | 0                  | 1           | 0              | 0            | 0              | 0               | 1          |
| Was the age and range given for patients in the Control group?                | 1                  | 0           | 0              | 0            | 1              | 1               | 1          |
| Were patients in each group treated along similar timelines?                  | 1                  | 1           | 0              | 1            | 1              | 1               | 1          |
| Of the patients asking to enter the study, did they actually take part in it? | 0                  | 0           | 0              | 0            | 0              | 0               | 0          |
| Were drop-out rates stated?                                                   | 0                  | 0           | 1              | 0            | 1              | 0               | 1          |
| Were outcomes clearly defined?                                                | 1                  | 1           | 1              | 1            | 1              | 1               | 1          |
| Were there blind assessors?                                                   | 0                  | 0           | 0              | 0            | 0              | 0               | 0          |
| Were there standardized assessment tools?                                     | 0                  | 1           | 1              | 0            | 0              | 0               | 1          |
| Was the analysis by intention to treat?                                       | 0                  | 0           | 0              | 1            | 1              | 0               | 1          |
| Score                                                                         | 10                 | 9           | 11             | 12           | 11             | 9               | 15         |

\*Total score, 20; <8, poor quality; 8-14, fair quality; ≥15, good quality.

**Supplementary table 2** Risk of bias for randomized controlled trials included in the meta-analysis

|                        | Random<br>Sequence<br>Generation | Allocation<br>concealment | Blinding of<br>participants | Incomplete<br>Outcome<br>data | Selective<br>Reporting | Other<br>Bias |
|------------------------|----------------------------------|---------------------------|-----------------------------|-------------------------------|------------------------|---------------|
| McGinn et al. 1985     | ?                                | +                         | ?                           | +                             | +                      | +             |
| Everett et al. 1986    | +                                | +                         | -                           | +                             | -                      | +             |
| Kracht et al. 1993     | +                                | +                         | +                           | +                             | +                      | +             |
| Docherty et al. 1995   | +                                | +                         | ?                           | +                             | +                      | +             |
| Cahill et al. 1989     | +                                | +                         | -                           | +                             | +                      | +             |
| Bubrick et al. 1991    |                                  |                           |                             |                               |                        |               |
| Gullichsen et al. 1992 | ?                                | ?                         | -                           | +                             | +                      | +             |
| Seow-Choen et al. 1994 | +                                | +                         | -                           | +                             | ?                      | +             |
| Galizia et al. 1999    | +                                | +                         | -                           | +                             | +                      | +             |
| Pahlman et al. 1997    | +                                | +                         | -                           | +                             | +                      | +             |
| Chen et al. 2009       | +                                | +                         | -                           | +                             | ?                      | +             |
| Nudelman et al. 2005   | ?                                | ?                         | -                           | +                             | +                      | +             |
| Friend et al. 1990     | +                                | +                         | -                           | +                             | -                      | +             |
| Thiede et al. 1984     | +                                | +                         | ?                           | -                             | +                      | +             |
| Beart et al. 1991      | +                                | +                         | ?                           | ?                             | ?                      | +             |
| Didolkar et al. 1986   | ?                                | +                         | ?                           | ?                             | ?                      | +             |
| Brennan et al. 1982    | ?                                | +                         | ?                           | +                             | +                      | +             |
| Fingerhut et al. 1995  | +                                | +                         | ?                           | ?                             | ?                      | +             |
| Sarker et al. 1994     | ?                                | ?                         | ?                           | ?                             | +                      | +             |
